# Supplementary material
Source: MDPI journal article supplement (https://www.mdpi.com/2073-4344/14/5/322)
Supplement: s1 [file s1]

## Supplementary Information

### Performance Evaluation and Durability Analysis of $\text{NiFeCoO}_x$ Catalysts for Alkaline Water Electrolysis in AEM Electrolyzers

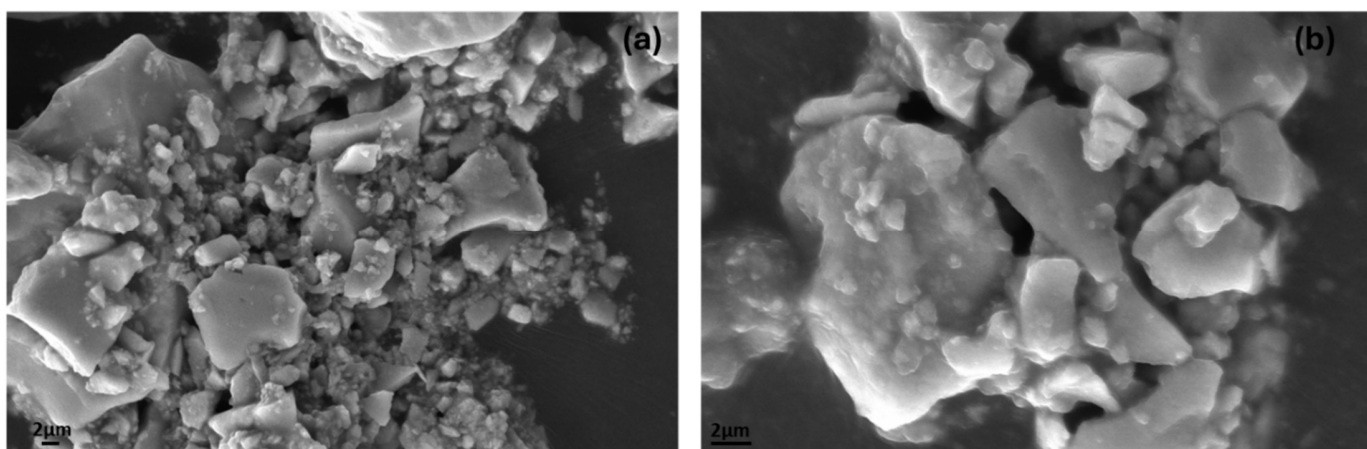

Figure S1. (a) SEM of  $\text{NiFeCoO}_x$  (5%Fe) and (b)  $\text{NiFeCo(OH)}_x$  (5%Fe) catalysts.

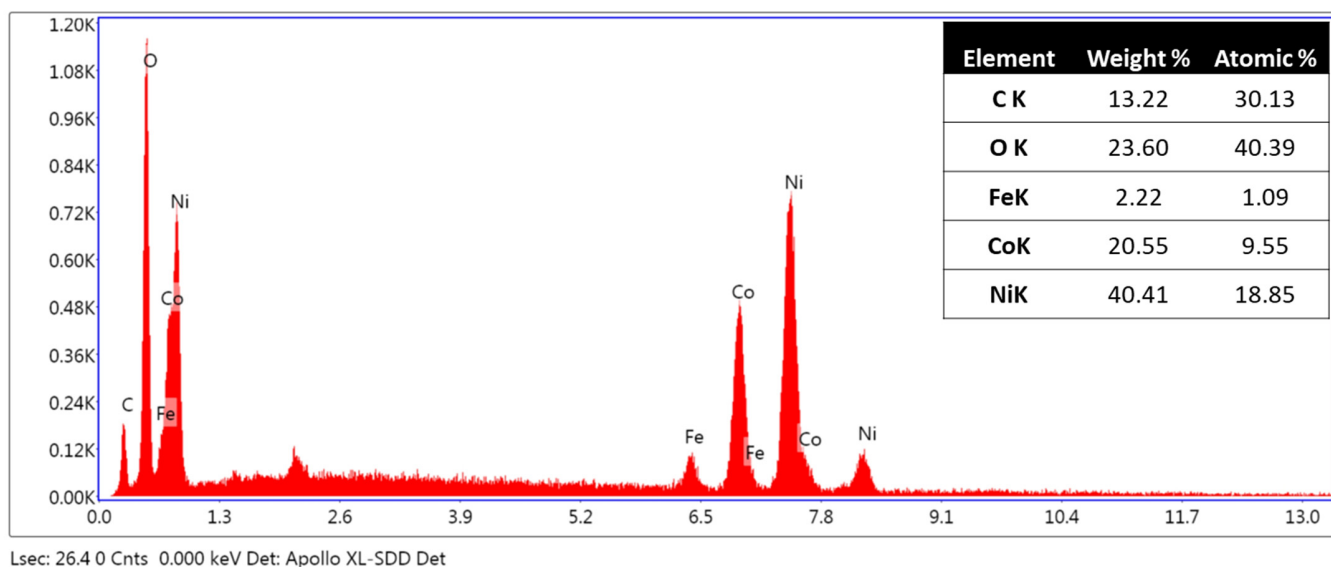

Figure S2. EDS spectra of NiFeCoO<sub>x</sub> (2.5% Fe).

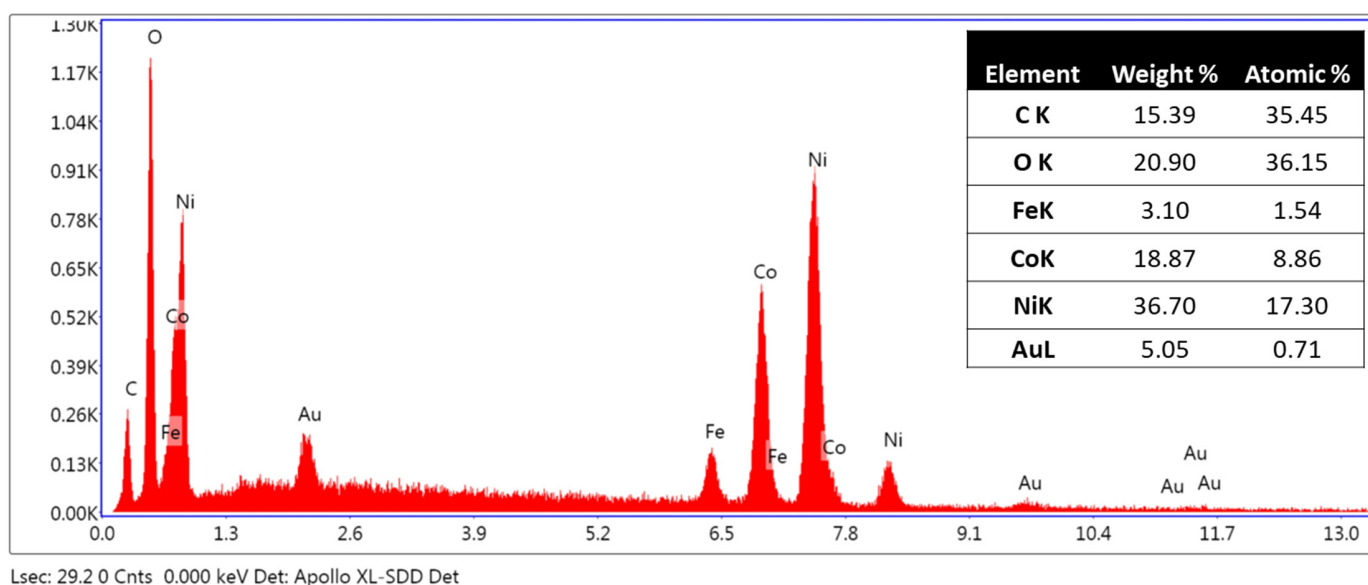

Figure S3. EDS spectra of NiFeCoO<sub>x</sub> (5% Fe).

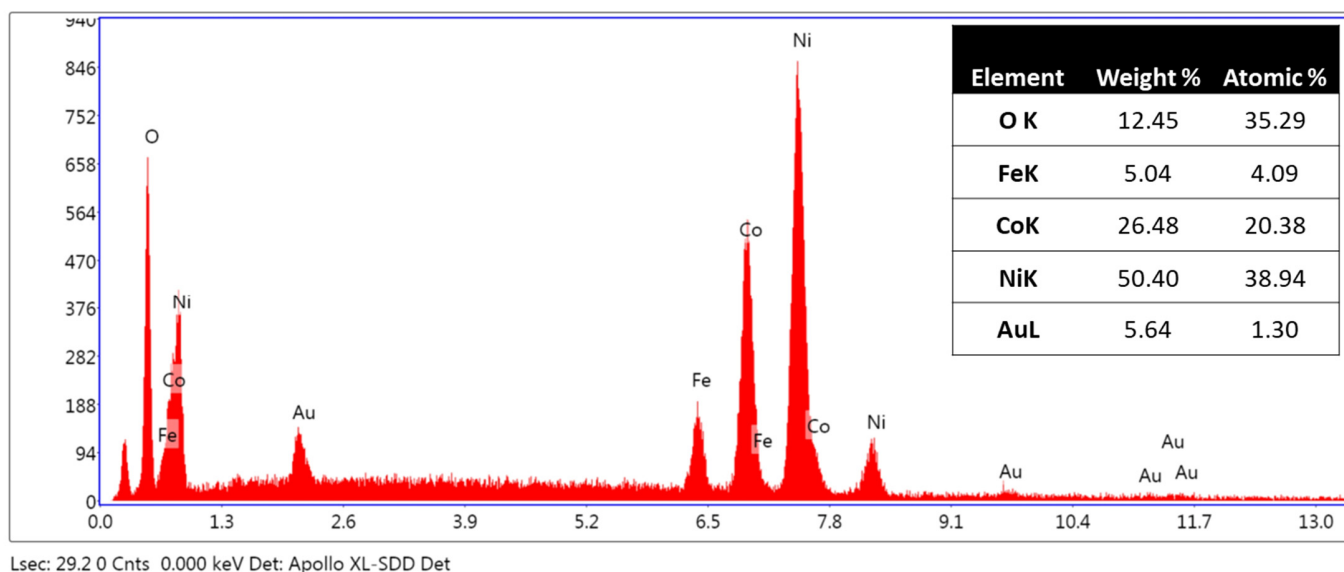

Figure S4. EDS spectra of NiFeCoO<sub>x</sub> (7.5% Fe).

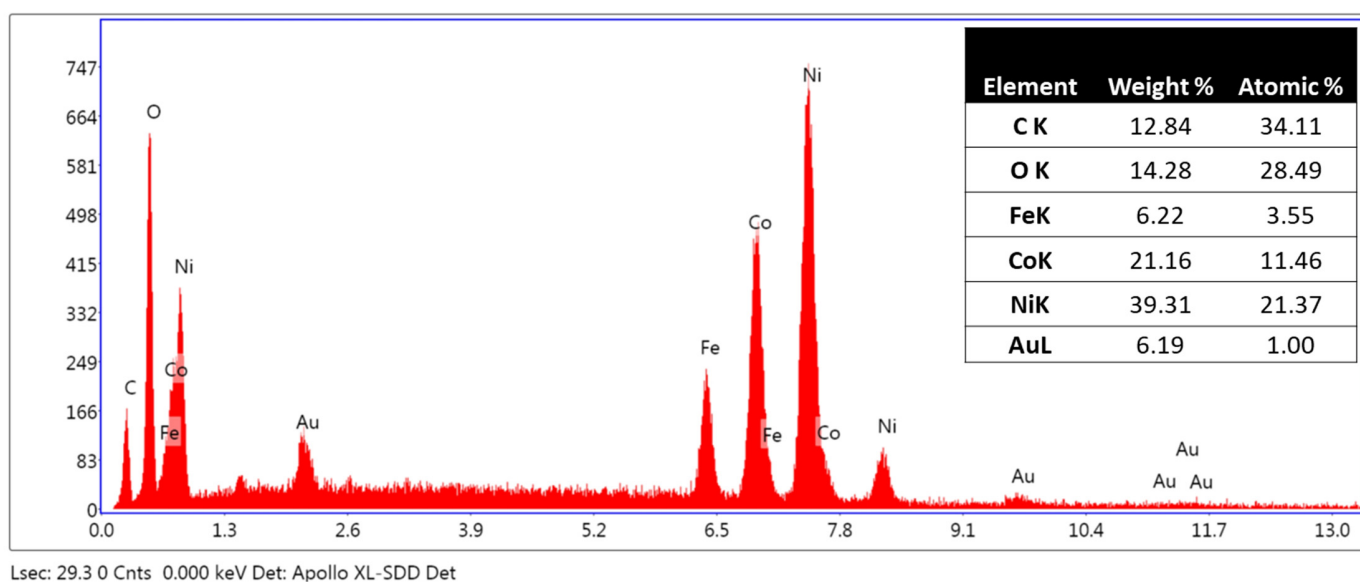

Figure S5. EDS spectra of NiFeCoO<sub>x</sub> (10% Fe).

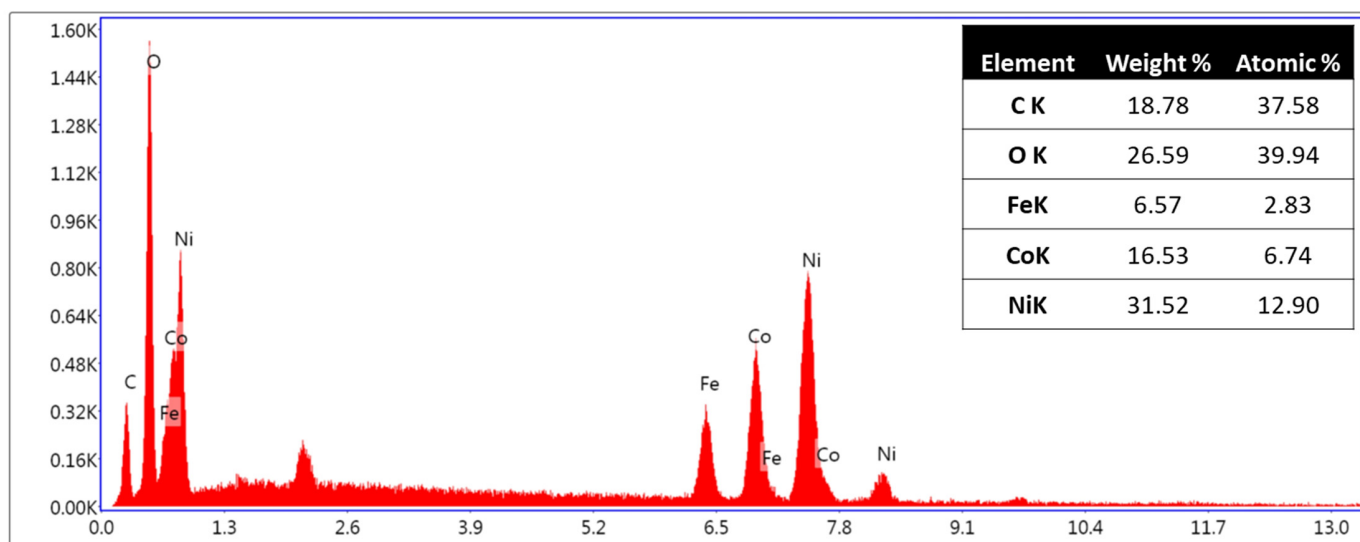

Lsec: 29.1 0 Cnts 0.000 keV Det: Apollo XL-SDD Det

Figure S6. EDS spectra of NiFeCoO<sub>x</sub> (12.5% Fe).
